# Supplementary material
Source: Elsevier journal article supplement (https://authors.library.caltech.edu/50028/8/mmc2.pdf)

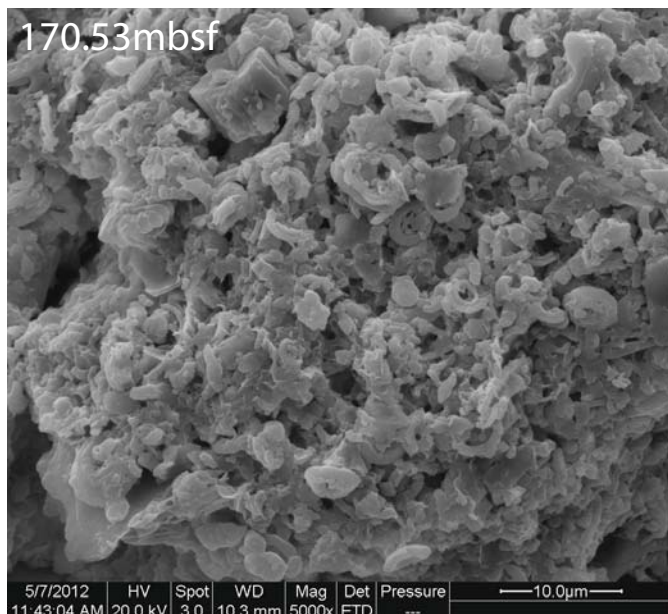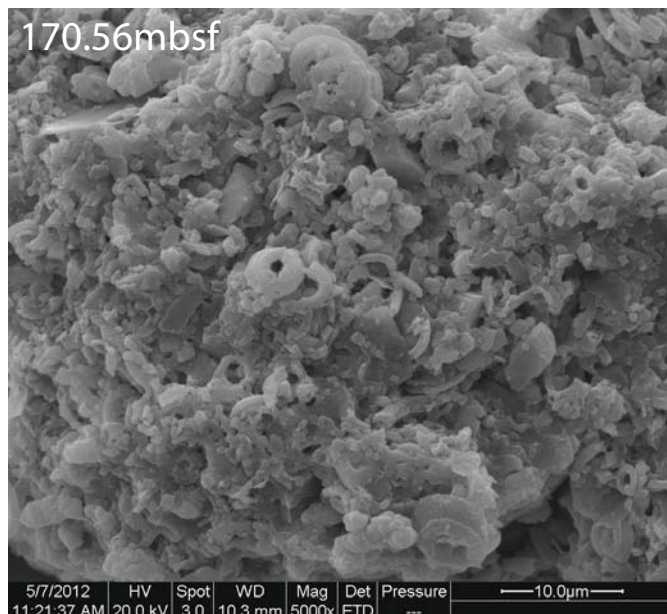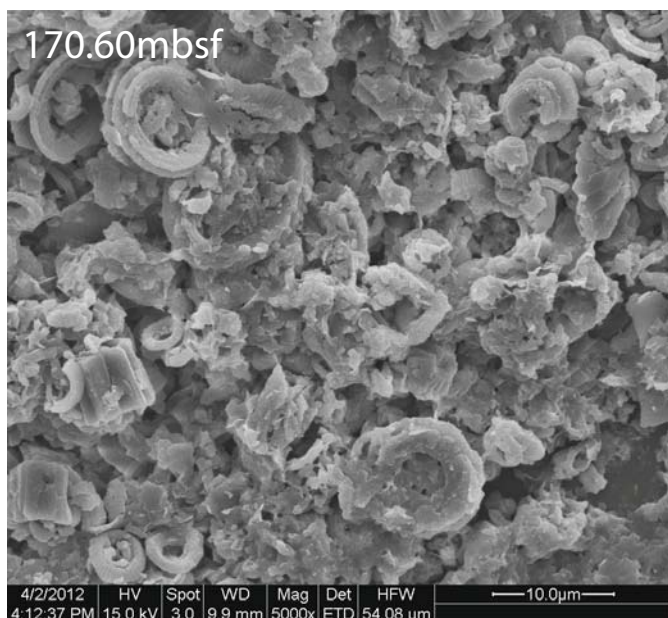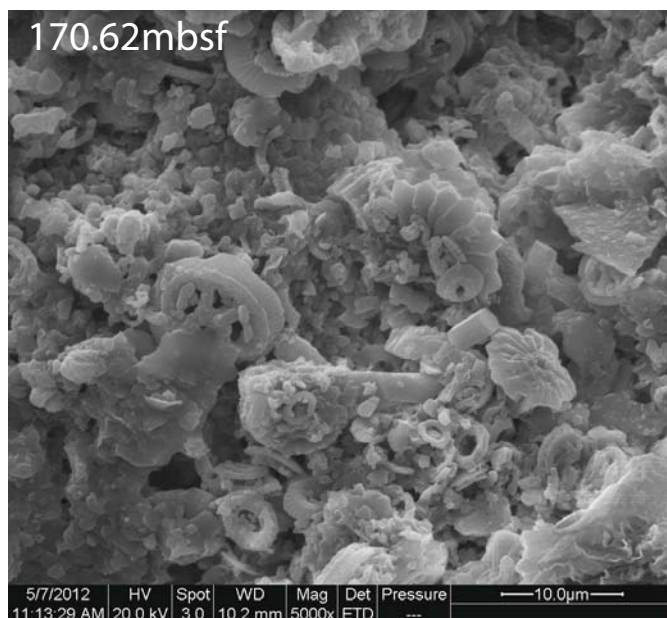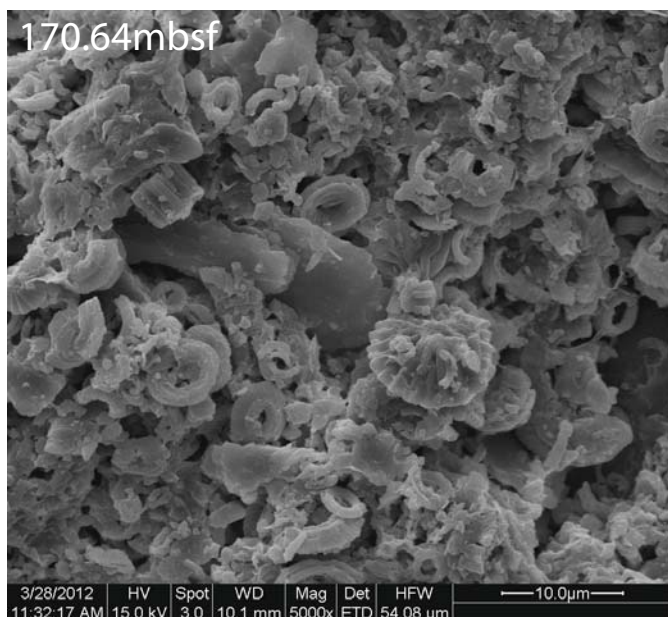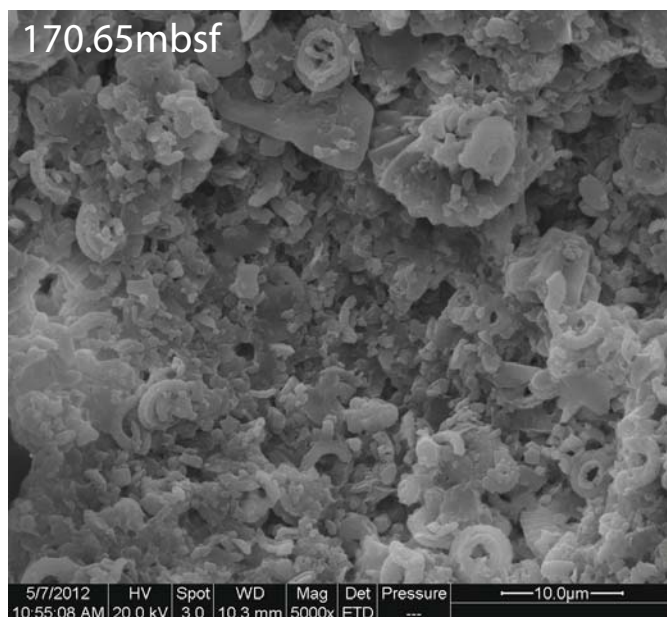



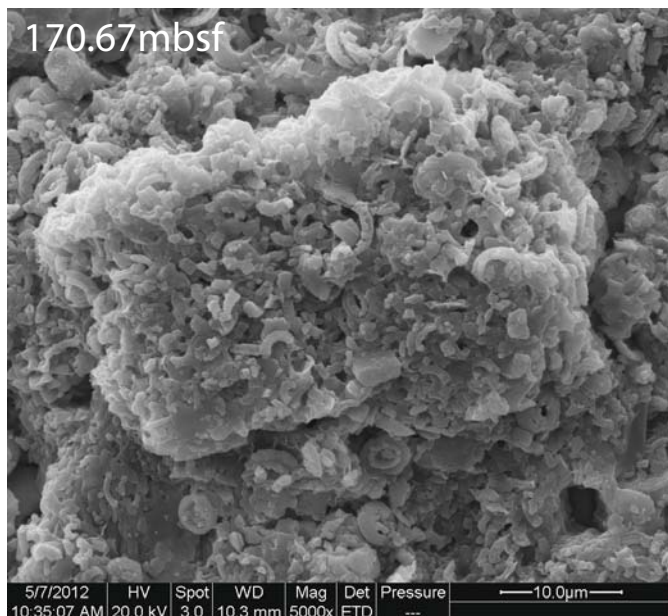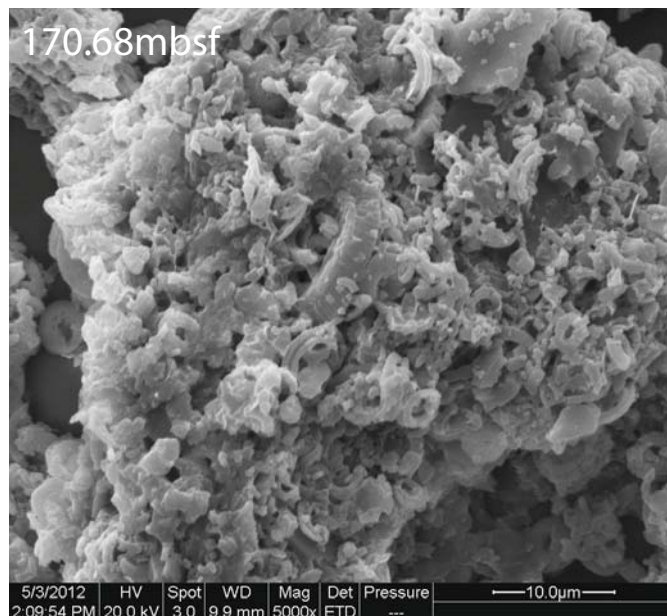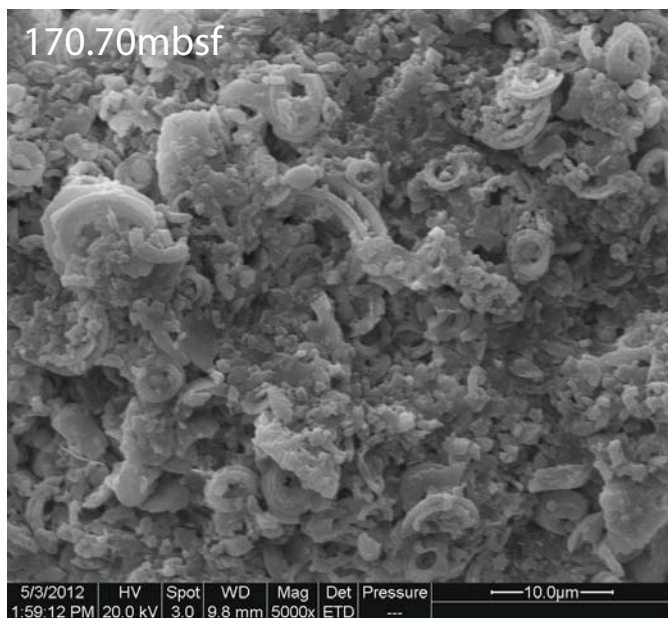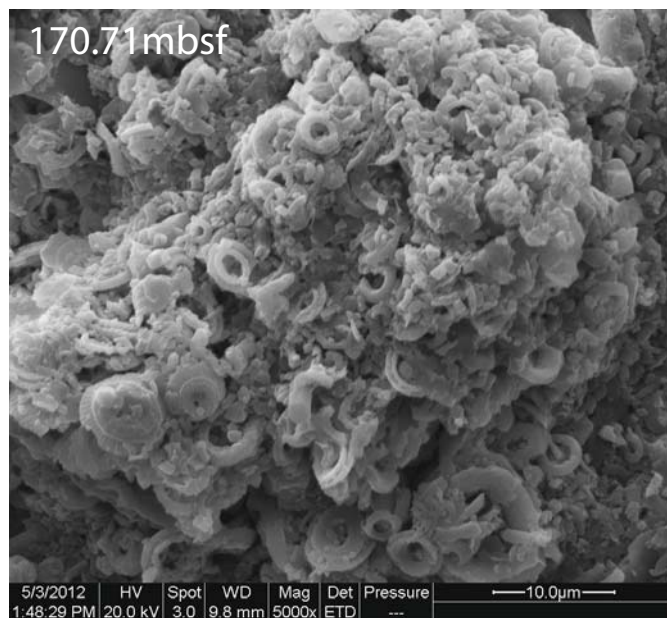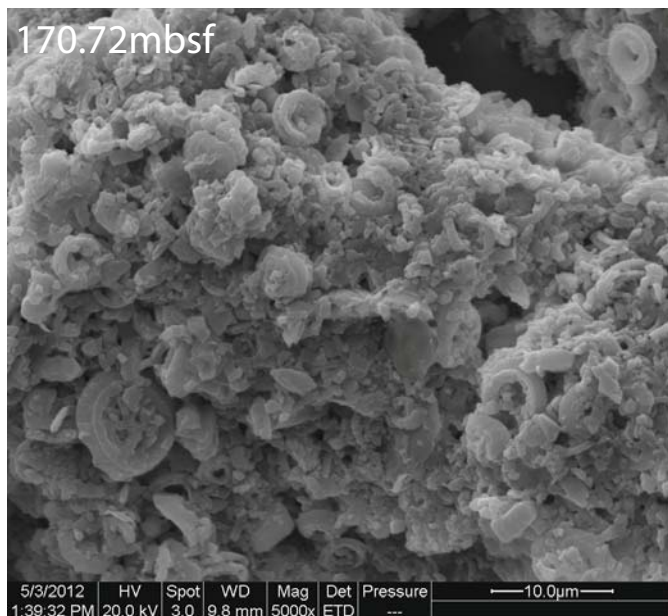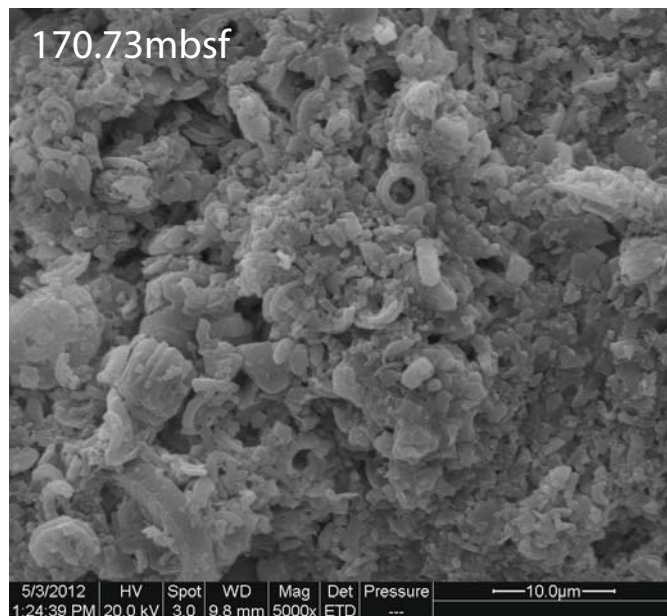



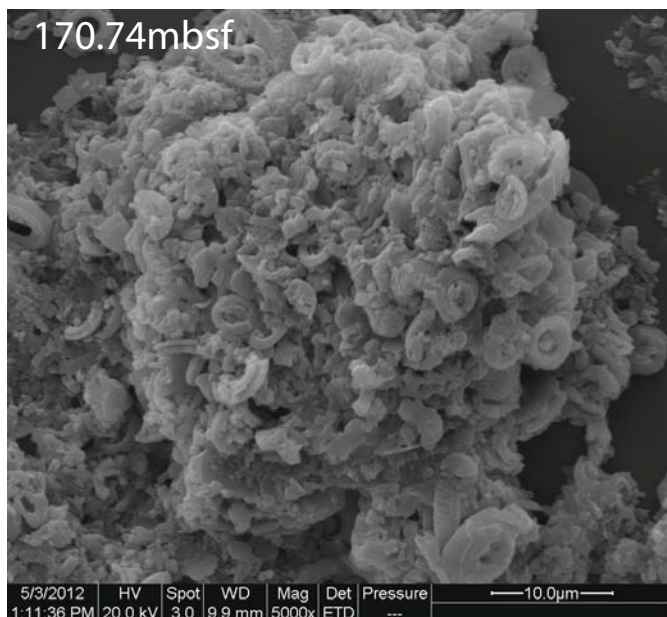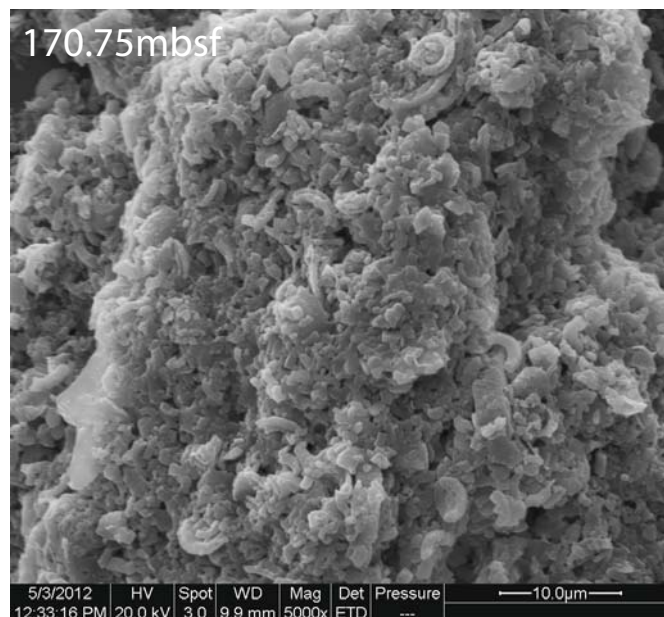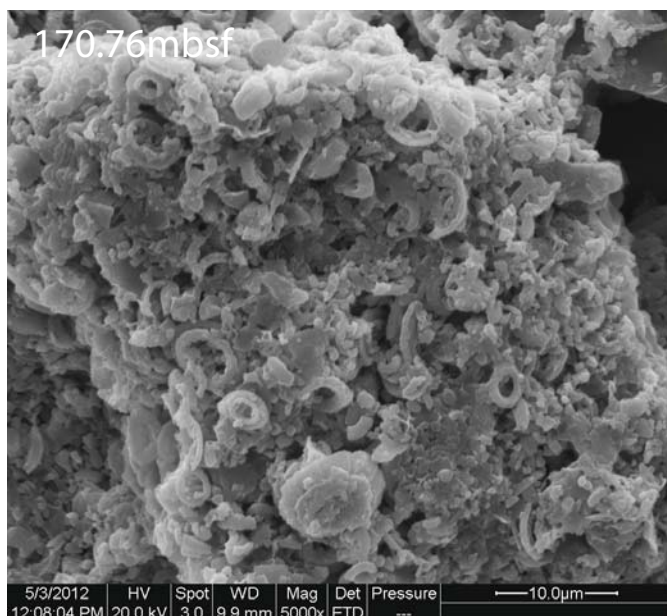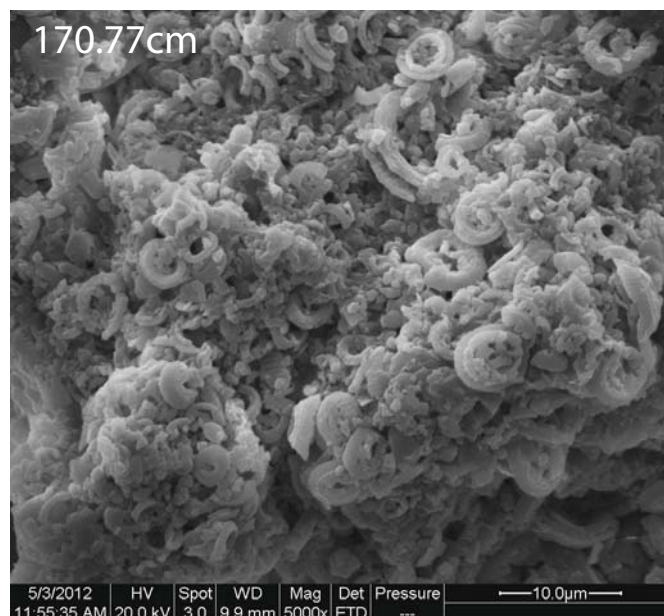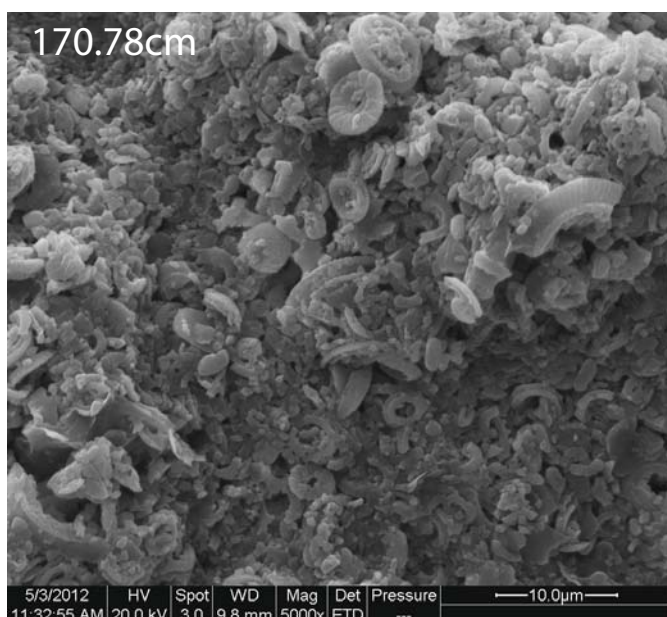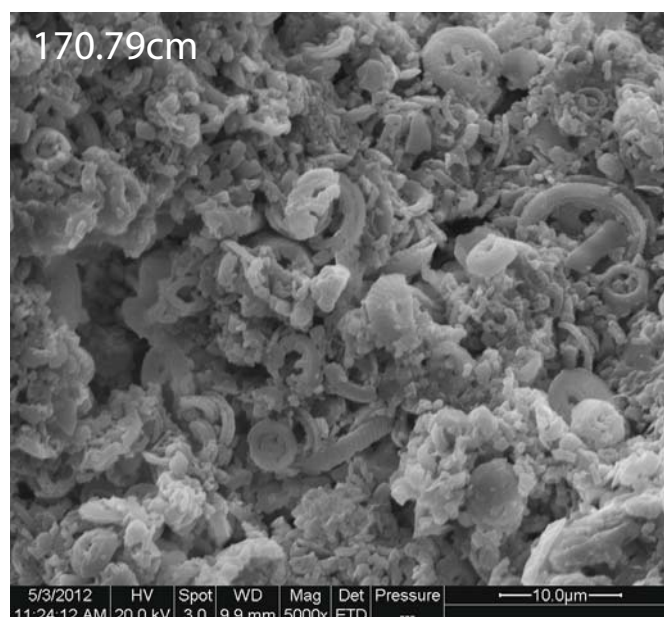

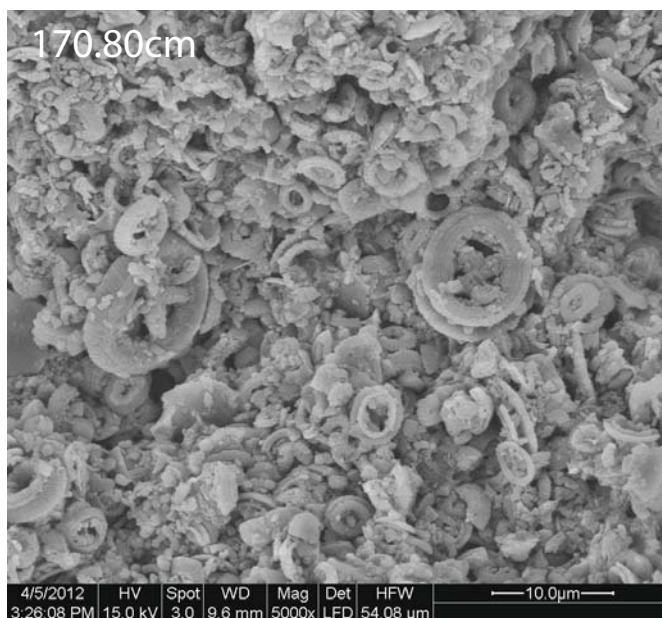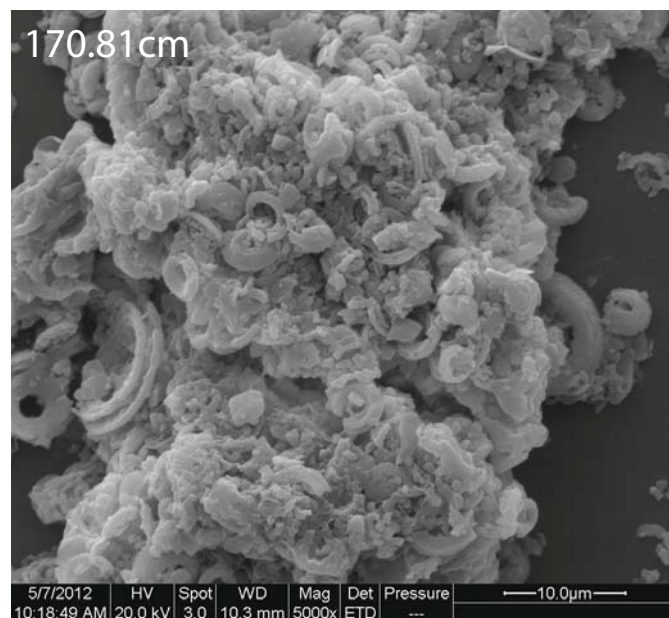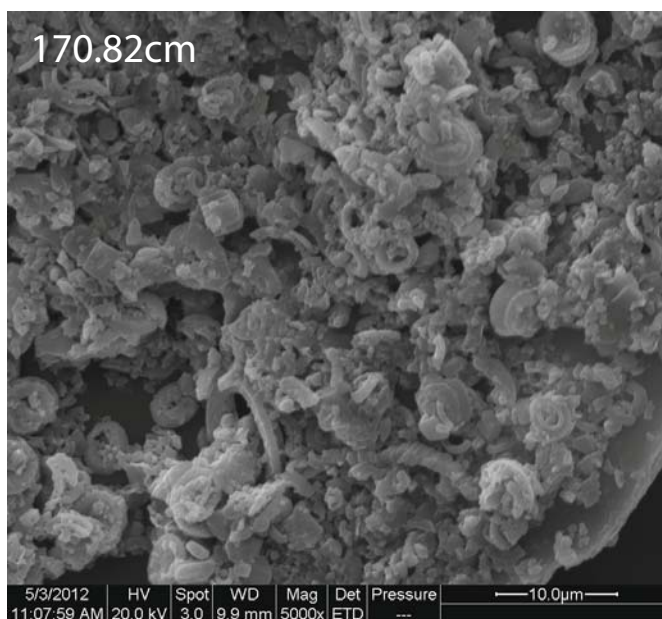

Supplement: mmc2 [file mmc2.pdf]
